# Supplementary material for: Persistent organic pollutants and non-alcoholic fatty liver disease in morbidly obese patients: a cohort study
Source: PubMed Central journal article supplement (PMC4588245; doi:10.1186/s12940-015-0066-z), 2015-09-29
Supplement: 12940_2015_66_MOESM1_ESM.pdf [file 12940_2015_66_MOESM1_ESM.pdf]

1 Table S1. Associations of liver histology with  $\beta$ -HCH and PCB118 at baseline.<sup>a, b</sup>

|                                 | n   | $\beta$ -HCH<br>Median<br>(ng/g lipid) | OR (95% CI)        | p-value | PCB118<br>Median<br>(ng/g lipid) | OR (95% CI)        | p-value |
|---------------------------------|-----|----------------------------------------|--------------------|---------|----------------------------------|--------------------|---------|
| Diagnosis                       |     |                                        |                    |         |                                  |                    |         |
| Normal                          | 38  | 13.4                                   | Ref                |         | 15.2                             | Ref                |         |
| Steatosis                       | 28  | 12.8                                   | 3.16 (0.47; 21.4)  | 0.239   | 9.42                             | 0.62 (0.09; 4.16)  | 0.622   |
| NASH                            | 31  | 11.9                                   | 0.42 (0.05; 3.74)  | 0.436   | 10.1                             | 0.21 (0.03; 1.39)  | 0.105   |
| Lobular Inflammation            |     |                                        |                    |         |                                  |                    |         |
| None                            | 92  | 13.2                                   | Ref                |         | 11.1                             | Ref                |         |
| <2 foci per 200*field           | 47  | 12.5                                   | 0.51 (0.11; 2.38)  | 0.393   | 9.14                             | 0.21 (0.05; 0.97)  | 0.046   |
| 2-4 foci per 200*field          | 10  | 8.93                                   | 0.02 (<0.01; 0.53) | 0.018   | 5.55                             | 0.02 (<0.01; 0.41) | 0.01    |
| Liver cell ballooning           |     |                                        |                    |         |                                  |                    |         |
| None                            | 109 | 13.3                                   | Ref                |         | 11.0                             | Ref                |         |
| Few balloon cells               | 36  | 12.0                                   | 0.17 (0.03; 1.07)  | 0.059   | 9.23                             | 0.19 (0.04; 0.91)  | 0.038   |
| Many cells/prominent ballooning | 4   | 8.65                                   | 0.53 (0.01; 37.3)  | 0.770   | 7.31                             | 0.53 (0.01; 31.4)  | 0.758   |
| Steatosisgrade                  |     |                                        |                    |         |                                  |                    |         |
| <5%                             | 50  | 13.1                                   | Ref                |         | 12.6                             | Ref                |         |
| 5-33%                           | 59  | 13.5                                   | 1.02 (0.24; 4.42)  | 0.974   | 9.83                             | 0.36 (0.08; 1.71)  | 0.201   |
| 33-66%                          | 23  | 11.9                                   | 0.18 (0.02; 1.87)  | 0.151   | 9.15                             | 0.16 (0.02; 1.25)  | 0.081   |
| >66%                            | 17  | 10.4                                   | 0.20 (0.02; 2.41)  | 0.204   | 9.14                             | 0.20 (0.02; 1.99)  | 0.171   |

2 <sup>a</sup> Results reported only for  $\beta$ -HCH and PCB118 for comparison with Table 3.3 <sup>b</sup> Concentrations of  $\beta$ -HCH and PCB118 (ng/g lipids) were log-transformed for the multinomial logistic regression analysis that was adjusted only for  
4 age.
