# Supplementary material for: Persistent organic pollutants and non-alcoholic fatty liver disease in morbidly obese patients: a cohort study
Source: PubMed Central journal article supplement (PMC4588245; doi:10.1186/s12940-015-0066-z), 2015-09-29
Supplement: 12940_2015_66_MOESM2_ESM.pdf [file 12940_2015_66_MOESM2_ESM.pdf]

1 Table S2. Associations of lobular inflammation status with PFAAs at baseline<sup>a</sup>.

| Compound | Lobular Inflammation status |     |                              |                   |         |                               |                   |         |
|----------|-----------------------------|-----|------------------------------|-------------------|---------|-------------------------------|-------------------|---------|
|          | None (n = 96)               |     | <2 foci per 200*field (n=53) |                   |         | 2-4 foci per 200*field (n=11) |                   |         |
|          | Median (ng/ml)              | Ref | Median (ng/ml)               | OR (95% CI)       | p-value | Median (ng/ml)                | OR (95% CI)       | p-value |
| PFHxA    | 0.06                        | Ref | 0.025                        | 0.63 (0.33; 1.22) | 0.169   | 0.083                         | 0.97 (0.30; 3.16) | 0.959   |
| PFOA     | 2.61                        | Ref | 2.61                         | 0.76 (0.13; 4.46) | 0.762   | 1.823                         | 0.06 (0.00; 1.20) | 0.066   |
| PFNA     | 0.84                        | Ref | 0.86                         | 0.96 (0.23; 3.97) | 0.952   | 0.64                          | 0.15 (0.01; 2.16) | 0.163   |
| PFDA     | 0.23                        | Ref | 0.29                         | 1.79 (0.46; 7.04) | 0.405   | 0.15                          | 0.12 (0.01; 1.39) | 0.089   |
| PFUnA    | 0.15                        | Ref | 0.14                         | 1.01 (0.46; 2.24) | 0.981   | 0.12                          | 0.59 (0.14; 2.44) | 0.467   |
| PFHxS    | 1.21                        | Ref | 1.12                         | 0.47 (0.11; 1.95) | 0.300   | 0.89                          | 0.16 (0.01; 1.81) | 0.138   |
| PFOS     | 3.3                         | Ref | 3.1                          | 0.97 (0.30; 3.18) | 0.963   | 2.35                          | 0.49 (0.05; 4.40) | 0.523   |
| sumPFCA  | 3.96                        | Ref | 4.04                         | 0.83 (0.12; 5.74) | 0.854   | 3.29                          | 0.05 (0.00; 1.48) | 0.084   |
| sumPFSA  | 4.82                        | Ref | 4.84                         | 0.87 (0.20; 3.82) | 0.849   | 4.58                          | 0.33 (0.02; 5.48) | 0.440   |

2 <sup>b</sup> Concentrations of PFAAs (ng/ml) were log-transformed for the multinomial logistic regression analysis that was adjusted only for age.
