# Supplementary material for: Persistent organic pollutants and non-alcoholic fatty liver disease in morbidly obese patients: a cohort study
Source: PubMed Central journal article supplement (PMC4588245; doi:10.1186/s12940-015-0066-z), 2015-09-29
Supplement: 12940_2015_66_MOESM3_ESM.pdf [file 12940_2015_66_MOESM3_ESM.pdf]

1 Table S3. Associations between ALT and POPs at baseline and at 12 months <sup>a</sup>.

| Compound        | Baseline (n=115)    |         | 12 months (n=92)   |         |
|-----------------|---------------------|---------|--------------------|---------|
|                 | B (95% CI)          | p-value | B (95% CI)         | p-value |
| HCB             | -0.17 (-0.38 ,0.04) | 0.109   | 0.10 (-0.10 ,0.29) | 0.328   |
| beta-HCH        | -0.17 (-0.34 ,0.00) | 0.046   | 0.14 (-0.07 ,0.34) | 0.193   |
| Trans-nonachlor | -0.05 (-0.20 ,0.11) | 0.549   | 0.17 (0.02 ,0.32)  | 0.032   |
| p,p'-DDE        | -0.04 (-0.16 ,0.08) | 0.545   | 0.12 (-0.01 ,0.25) | 0.075   |
| PCB 118         | -0.06 (-0.23 ,0.11) | 0.484   | 0.15 (-0.03 ,0.33) | 0.092   |
| PCB 153         | -0.11 (-0.32 ,0.10) | 0.317   | 0.18 (-0.01 ,0.38) | 0.069   |
| PCB 138         | -0.11 (-0.29 ,0.07) | 0.236   | 0.15 (-0.03 ,0.34) | 0.107   |
| PCB 156         | -0.09 (-0.29 ,0.12) | 0.399   | 0.18 (-0.01 ,0.38) | 0.059   |
| PCB 180         | -0.11 (-0.37 ,0.15) | 0.404   | 0.19 (-0.02 ,0.39) | 0.081   |
| PCB 170         | -0.13 (-0.40 ,0.15) | 0.362   | 0.19 (-0.03 ,0.42) | 0.091   |
| BDE 47          | 0.11 (-0.03 ,0.26)  | 0.122   | 0.05 (-0.09 ,0.19) | 0.459   |
| BDE 153         | 0.14 (0.02 ,0.27)   | 0.024   | 0.15 (0.03 ,0.26)  | 0.013   |
| BDE 209         | 0.00 (-0.10 ,0.09)  | 0.960   | 0.02 (-0.08 ,0.12) | 0.698   |
| Sum of 6 PCBs   | -0.12 (-0.34 ,0.11) | 0.302   | 0.18 (-0.02 ,0.39) | 0.078   |
| Sum of 4 BDEs   | 0.05 (-0.07 ,0.16)  | 0.454   | 0.07 (-0.05 ,0.20) | 0.249   |

2 <sup>a</sup> Concentrations of POPs (ng/g lipids) and ALT were log-transformed for the linear regression analysis  
3 that at baseline was adjusted only for age.
