# Supplementary material for: Persistent organic pollutants and non-alcoholic fatty liver disease in morbidly obese patients: a cohort study
Source: PubMed Central journal article supplement (PMC4588245; doi:10.1186/s12940-015-0066-z), 2015-09-29
Supplement: 12940_2015_66_MOESM4_ESM.pdf [file 12940_2015_66_MOESM4_ESM.pdf]

1 Table S4. Associations of ALT with POPs at baseline and at 12 months stratified by sex.

| Sex             | Male                         |         |                               |         | Female                       |         |                               |         |
|-----------------|------------------------------|---------|-------------------------------|---------|------------------------------|---------|-------------------------------|---------|
|                 | Baseline (n=36) <sup>a</sup> |         | 12 months (n=30) <sup>b</sup> |         | Baseline (n=79) <sup>a</sup> |         | 12 months (n=61) <sup>b</sup> |         |
| Compound        | B (95% CI)                   | p-value | B (95% CI)                    | p-value | B (95% CI)                   | p-value | B (95% CI)                    | p-value |
| HCB             | -0.42 (-0.82, -0.02)         | 0.041   | 0.03 (-0.35, 0.41)            | 0.863   | -0.14 (-0.38, 0.11)          | 0.279   | 0.13 (-0.08, 0.34)            | 0.213   |
| β-HCH           | -0.49 (-0.78, -0.19)         | 0.002   | 0.03 (-0.37, 0.43)            | 0.885   | -0.09 (-0.29, 0.11)          | 0.364   | 0.30 (0.07, 0.53)             | 0.012   |
| Trans-nonachlor | -0.23 (-0.50, 0.05)          | 0.098   | 0.08 (-0.25, 0.41)            | 0.624   | -0.07 (-0.26, 0.12)          | 0.483   | 0.20 (0.04, 0.36)             | 0.014   |
| p,p'-DDE        | -0.03 (-0.25, 0.19)          | 0.784   | 0.28 (0.02, 0.55)             | 0.038   | -0.04 (-0.19, 0.10)          | 0.567   | 0.07 (-0.07, 0.21)            | 0.315   |
| PCB 118         | -0.16 (-0.44, 0.12)          | 0.240   | 0.18 (-0.15, 0.51)            | 0.273   | -0.05 (-0.25, 0.16)          | 0.667   | 0.24 (0.04, 0.45)             | 0.019   |
| PCB 153         | -0.29 (-0.66, 0.08)          | 0.116   | 0.26 (-0.16, 0.69)            | 0.216   | -0.16 (-0.43, 0.10)          | 0.220   | 0.21 (-0.02, 0.43)            | 0.066   |
| PCB 138         | -0.21 (-0.49, 0.08)          | 0.146   | 0.22 (-0.19, 0.63)            | 0.278   | -0.14 (-0.36, 0.09)          | 0.226   | 0.18 (-0.03, 0.39)            | 0.092   |
| PCB 156         | -0.26 (-0.64, 0.13)          | 0.181   | 0.19 (-0.19, 0.56)            | 0.316   | -0.16 (-0.41, 0.09)          | 0.212   | 0.24 (0.02, 0.45)             | 0.034   |
| PCB 180         | -0.38 (-0.90, 0.14)          | 0.150   | 0.30 (-0.14, 0.74)            | 0.166   | -0.26 (-0.59, 0.06)          | 0.108   | 0.23 (-0.02, 0.47)            | 0.068   |
| PCB 170         | -0.41 (-0.93, 0.12)          | 0.124   | 0.29 (-0.15, 0.73)            | 0.187   | -0.29 (-0.63, 0.06)          | 0.100   | 0.22 (-0.05, 0.48)            | 0.105   |
| BDE 47          | 0.07 (-0.20, 0.35)           | 0.582   | -0.09 (-0.47, 0.30)           | 0.647   | 0.09 (-0.09, 0.26)           | 0.333   | 0.16 (0.03, 0.29)             | 0.021   |
| BDE 153         | 0.17 (-0.09, 0.43)           | 0.187   | 0.05 (-0.27, 0.37)            | 0.745   | 0.10 (-0.05, 0.25)           | 0.178   | 0.18 (0.07, 0.29)             | 0.002   |
| BDE 209         | 0.01 (-0.14, 0.15)           | 0.933   | -0.03 (-0.21, 0.16)           | 0.746   | -0.03 (-0.15, 0.09)          | 0.638   | 0.05 (-0.06, 0.16)            | 0.345   |
| Sum of 6 PCBs   | -0.34 (-0.75, 0.07)          | 0.102   | 0.27 (-0.17, 0.70)            | 0.219   | -0.19 (-0.47, 0.09)          | 0.180   | 0.23 (-0.01, 0.46)            | 0.059   |
| Sum of 4 BDEs   | 0.07 (-0.13, 0.27)           | 0.457   | -0.07 (-0.34, 0.21)           | 0.626   | 0.00 (-0.15, 0.15)           | 0.996   | 0.16 (0.03, 0.29)             | 0.016   |

2 <sup>a</sup> At baseline concentrations of POPs (ng/g lipids) and ALT were log-transformed for the linear regression analysis that was adjusted for age, BMI and  
3 fasting insulin.

4 <sup>b</sup> At 12 months concentrations of POPs (ng/g lipids) and ALT were log-transformed for the linear regression analysis that was adjusted for age, weight  
5 change (kg) and fasting insulin.
